# Supplementary material for: Maternal anxiety, depression and asthma and adverse pregnancy outcomes – a population based study
Source: PubMed Central journal article supplement (PMC6739415; doi:10.1038/s41598-019-49508-z), 2019-09-11
Supplement: 41598_2019_49508_MOESM1_ESM.pdf [file 41598_2019_49508_MOESM1_ESM.pdf]

# Maternal anxiety, depression and asthma and adverse pregnancy outcomes – a population based study

\*Gustaf Rejnö<sup>1, 2</sup>, MD PhD

Cecilia Lundholm<sup>1</sup>, MSc

Sara Öberg<sup>1</sup>, MD PhD

Paul Lichtenstein<sup>1</sup>, PhD

Henrik Larsson<sup>1, 3</sup>, PhD

Brian D'Onofrio<sup>1, 4</sup>, PhD

Kjell Larsson<sup>5</sup>, MD PhD

Sissel Saltvedt<sup>6, 7</sup>, MD PhD

Bronwyn K Brew<sup>1</sup>, PhD

Catarina Almqvist<sup>1, 8</sup>, MD PhD

<sup>1</sup>Dept of Medical Epidemiology and Biostatistics, Karolinska Institutet, Stockholm, Sweden

<sup>2</sup>Obstetrics and Gynaecology Unit, Söderjukhuset, Stockholm, Sweden

<sup>3</sup>School of Medical Sciences, Örebro Universitet, Örebro, Sweden

<sup>4</sup>Department of Psychological and Brain Sciences, Indiana University, Bloomington, USA

<sup>5</sup>Institute of Environmental Medicine, Karolinska Institutet, Stockholm, Sweden

<sup>6</sup>Department of Women's and Children's Health, Karolinska Institutet, Stockholm, Sweden

<sup>7</sup>Obstetrics & Gynaecology Unit, Karolinska University Hospital, Stockholm, Sweden

<sup>8</sup>Pediatric Allergy and Pulmonology Unit at Astrid Lindgren Children's Hospital, Karolinska University Hospital, Stockholm, Sweden

## ***Corresponding author:***

Gustaf Rejnö, MD PhD

Department of Medical Epidemiology and Biostatistics

PO Box 281, Karolinska Institutet

SE 171 77 Stockholm, SWEDEN

Tel: +46 70 580 17 29

Fax: +46 8 31 49 75

E-mail: [gustaf.rejno@ki.se](mailto:gustaf.rejno@ki.se)

**Table S1 Estimation of odds ratios and beta coefficients in women with anxiety/depression versus women without anxiety/depression, depending on asthma status\*. Multiplicative interaction between maternal anxiety or depression and maternal asthma for the effect on pregnancy, delivery, and perinatal outcomes.**

|                                                      | All women without asthma            |                                     | All women with asthma               |                                     | Multiplicative interaction          |
|------------------------------------------------------|-------------------------------------|-------------------------------------|-------------------------------------|-------------------------------------|-------------------------------------|
|                                                      | Crude                               | Adjusted <sup>†</sup>               | Crude                               | Adjusted <sup>†</sup>               | for adjusted <sup>†</sup> estimates |
|                                                      | OR or Beta (95% CI)                 | OR or Beta (95% CI)                 | OR or Beta (95% CI)                 | OR or Beta (95% CI)                 | P-values                            |
| <b>Pregnancy Characteristics</b>                     |                                     |                                     |                                     |                                     |                                     |
| <i>Preeclampsia or Eclampsia</i>                     | 1.21 (1.16 - 1.26)                  | 1.15 (1.10 - 1.20)                  | 1.21 (1.07 - 1.37)                  | 1.14 (1.00 - 1.29)                  | 0.842                               |
| <i>Placental abruption</i>                           | 1.18 (1.03 - 1.36)                  | 1.04 (0.90 - 1.20)                  | 1.00 (0.64 - 1.57)                  | 0.86 (0.55 - 1.34)                  | 0.399                               |
| <b>Labor Characteristics</b>                         |                                     |                                     |                                     |                                     |                                     |
| <i>Mode of Delivery</i>                              |                                     |                                     |                                     |                                     |                                     |
| <i>Vaginal non-instrumental delivery</i>             | Ref.                                | Ref.                                | Ref.                                | Ref.                                | Ref.                                |
| <i>Elective CS (before start of labor)</i>           | 1.68 (1.63 - 1.74)                  | 1.62 (1.57 - 1.68)                  | 1.40 (1.27 - 1.55)                  | 1.35 (1.22 - 1.50)                  | <0.001 <sup>‡</sup>                 |
| <i>Vaginal instrumental delivery</i>                 | 1.10 (1.07 - 1.14)                  | 1.14 (1.10 - 1.18)                  | 1.05 (0.94 - 1.18)                  | 1.10 (0.98 - 1.24)                  | 0.609                               |
| <i>Emergency CS prior to or after start of labor</i> | 1.37 (1.33 - 1.41)                  | 1.30 (1.26 - 1.34)                  | 1.34 (1.23 - 1.47)                  | 1.25 (1.14 - 1.37)                  | 0.405                               |
| <b>Birth outcome and post-partum</b>                 |                                     |                                     |                                     |                                     |                                     |
| <i>Birth weight, mean grams</i>                      | -62 (-67 to -57) <sup>‡</sup>       | -49 (-55 to -44) <sup>‡</sup>       | -80 (-98 to -61) <sup>‡</sup>       | -66 (-84 to -48) <sup>‡</sup>       | 0.060                               |
| <i>Gest. age, mean weeks</i>                         | -0.31 (-0.33 to -0.29) <sup>‡</sup> | -0.28 (-0.30 to -0.26) <sup>‡</sup> | -0.37 (-0.43 to -0.31) <sup>‡</sup> | -0.33 (-0.39 to -0.27) <sup>‡</sup> | 0.080                               |
| <i>Small for gestational age</i>                     | 1.16 (1.10 - 1.24)                  | 1.00 (0.94 - 1.07)                  | 1.26 (1.07 - 1.49)                  | 1.05 (0.89 - 1.24)                  | 0.611                               |
| <i>Large for gestational age</i>                     | 1.16 (1.11 - 1.21)                  | 1.10 (1.05 - 1.15)                  | 1.16 (1.00 - 1.35)                  | 1.07 (0.92 - 1.26)                  | 0.782                               |

\* Anxiety, depression and asthma from the year before pregnancy until end of pregnancy.

<sup>†</sup> Adjusted for country of birth, smoking, cohabitation, maternal education level, BMI, age

<sup>‡</sup> P<0.01

**Table S2. The association between anxiety/depression during pregnancy\* and perinatal characteristics; adjusted logistic and linear full cohort analysis, stratified on birth years 2001-2004 or 2010-2013**

|                                                      | Current Anxiety/depression                                  |                                                             |
|------------------------------------------------------|-------------------------------------------------------------|-------------------------------------------------------------|
|                                                      | 2001-2004                                                   | 2010-2013                                                   |
|                                                      | Logistic & Linear Regression Adjusted† OR and beta (95% CI) | Logistic & Linear Regression Adjusted† OR and beta (95% CI) |
| <b>Pregnancy Characteristics</b>                     |                                                             |                                                             |
| <i>Preeclampsia or Eclampsia</i>                     | 1.07 (0.95 - 1.20)                                          | 1.12 (1.06 - 1.19)                                          |
| <i>Placental abruption</i>                           | 0.93 (0.65 - 1.31)                                          | 0.98 (0.79 - 1.23)                                          |
| <b>Labor Characteristics</b>                         |                                                             |                                                             |
| <i>Mode of Delivery</i>                              |                                                             |                                                             |
| <i>Vaginal non-instrumental delivery</i>             | Ref.                                                        | Ref.                                                        |
| <i>Elective CS (before start of labor)</i>           | 1.59 (1.46 - 1.73)                                          | 1.59 (1.52 - 1.67)                                          |
| <i>Vaginal instrumental delivery</i>                 | 1.14 (1.04 - 1.24)                                          | 1.18 (1.12 - 1.24)                                          |
| <i>Emergency CS prior to or after start of labor</i> | 1.24 (1.15 - 1.34)                                          | 1.33 (1.28 - 1.39)                                          |
| <b>Birth outcome and post-partum</b>                 |                                                             |                                                             |
| <i>Birth weight, mean grams</i>                      | -42 (-55 to -29)‡                                           | -50 (-57 to -43)‡                                           |
| <i>Gest. age, mean weeks</i>                         | -0.24 (-0.29 to -0.20)‡                                     | -0.30 (-0.33 to -0.28)‡                                     |
| <i>Small for gestational age</i>                     | 0.91 (0.78 - 1.06)                                          | 1.02 (0.93 - 1.11)                                          |
| <i>Large for gestational age</i>                     | 1.13 (1.01 - 1.27)                                          | 1.12 (1.05 - 1.19)                                          |

\* Maternal anxiety and/or depression from the year before pregnancy until delivery

† Adjusted for country of birth, smoking, cohabitation, maternal education level, BMI, age

‡ P < 0.001

**Table S3. Pregnancies with maternal anxiety/depression diagnose in the year before pregnancy until delivery with or without medication\*. Years 2006-2013.**

|                                                      | Current Anxiety/depression with medication |      | Current Anxiety/depression w/o medication |                                                    |                                                   |
|------------------------------------------------------|--------------------------------------------|------|-------------------------------------------|----------------------------------------------------|---------------------------------------------------|
|                                                      | n=11,724                                   |      | n=6960                                    |                                                    |                                                   |
|                                                      | n(%)                                       |      | n(%)                                      | Logistic & Linear Regression<br>Crude est (95% CI) | Logistic & Linear Regression<br>Adj† est (95% CI) |
| <b>Pregnancy Characteristics</b>                     |                                            |      |                                           |                                                    |                                                   |
| <i>Preeclampsia or Eclampsia</i>                     | 626 (5.3)                                  | 1.00 | 292 (4.2)                                 | 0.78 (0.67 - 0.90)                                 | 0.81 (0.70 - 0.94)                                |
| <i>Placental abruption</i>                           | 54 (0.5)                                   | 1.00 | 28 (0.4)                                  | 0.87 (0.55 - 1.38)                                 | 0.92 (0.57 - 1.47)                                |
| <b>Labor Characteristics</b>                         |                                            |      |                                           |                                                    |                                                   |
| <i>Mode of Delivery</i>                              |                                            |      |                                           |                                                    |                                                   |
| <i>Vaginal non-instrumental delivery</i>             | 8100 (69.6)                                | 1.00 | 4819 (69.6)                               | Ref.                                               | Ref.                                              |
| <i>Elective CS (before start of labor)</i>           | 1120 (9.6)                                 | 1.00 | 831 (12.0)                                | 1.25 (1.13 - 1.38)                                 | 1.30 (1.17 - 1.43)                                |
| <i>Vaginal instrumental delivery</i>                 | 916 (7.8)                                  | 1.00 | 476 (6.8)                                 | 0.87 (0.78 - 0.98)                                 | 0.89 (0.79 - 1.01)                                |
| <i>Emergency CS prior to or after start of labor</i> | 1511 (12.9)                                | 1.00 | 802 (11.5)                                | 0.89 (0.81 - 0.98)                                 | 0.94 (0.86 - 1.04)                                |
| <i>Missing</i>                                       | 77 (0.7)                                   |      | 32 (0.5)                                  |                                                    |                                                   |
| <b>Birth outcome and post-partum</b>                 |                                            |      |                                           |                                                    |                                                   |
| <i>Birth weight, mean grams</i>                      | 3471                                       | 3471 | 3522                                      | 50 (33 to 68)‡                                     | 58 (41 to 75)‡                                    |
| <i>Missing</i>                                       | 28 (0.2)                                   |      | 9 (0.1)                                   |                                                    |                                                   |
| <i>Gest. age, mean weeks</i>                         | 39.2                                       | 1.00 | 38.9                                      | 0.25 (0.19 to 0.31)‡                               | 0.25 (0.19 to 0.31)‡                              |
| <i>Missing</i>                                       | 0 (0.0)                                    |      | 2 (0.0)                                   |                                                    |                                                   |
| <i>Small for gestational age</i>                     | 287 (2.5)                                  | 1.00 | 153 (2.2)                                 | 0.89 (0.73 - 1.09)                                 | 0.92 (0.75 - 1.12)                                |
| <i>Missing</i>                                       | 24 (0.2)                                   |      | 5 (0.1)                                   |                                                    |                                                   |
| <i>Large for gestational age</i>                     | 496 (4.2)                                  | 1.00 | 304 (4.4)                                 | 1.03 (0.89 - 1.20)                                 | 1.10 (0.94 - 1.28)                                |
| <i>Missing</i>                                       | 24 (0.2)                                   |      | 5 (0.1)                                   |                                                    |                                                   |

\* Anxiety/depression diagnosis in the Swedish National Patient Register. Antidepressant medication dispensed at least twice in the year before pregnancy until birth according to the Swedish Prescribed Drug Register

† Adjusted for country of birth, smoking, cohabitation, maternal education level, BMI, age

‡  $P < 0.001$
